# Supplementary figures and images for: MiRNA-107 enhances the malignant progression of pancreatic cancer by targeting TGFBR3
Source: PubMed Central journal article supplement (PMC8133469; doi:10.1371/journal.pone.0249375), 2021-05-19

# Full unedited image for Fig. 5A

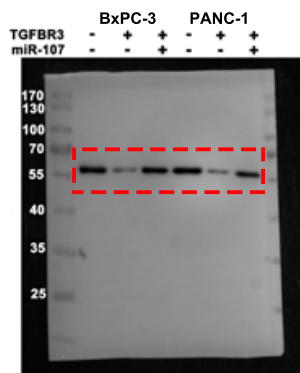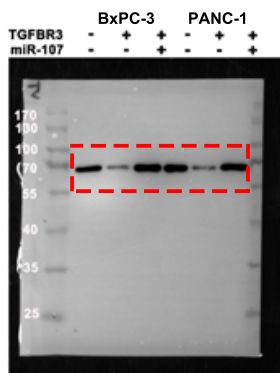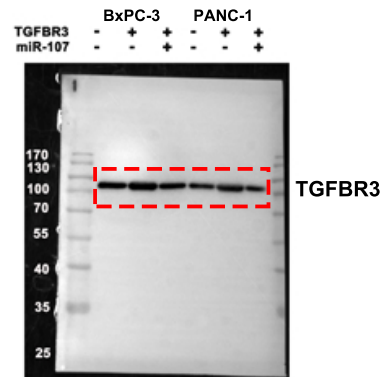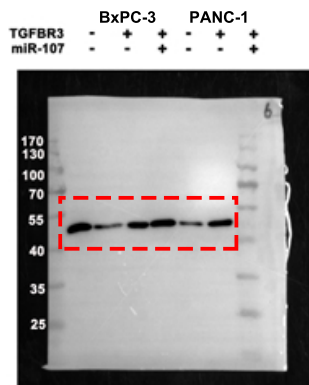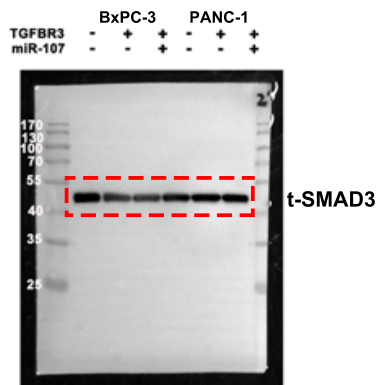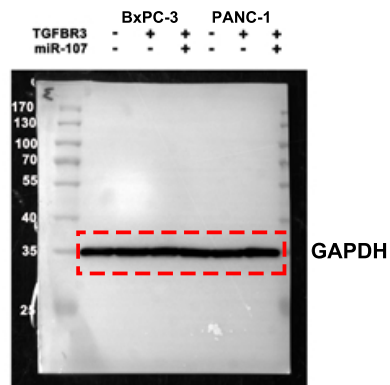

Supplement: pone.0249375.s001.pdf [file pone.0249375.s001.pdf]
